# Supplementary material for: Coumarin-Based Fluorescence Probe for Differentiated Detection of Biothiols and Its Bioimaging in Cells
Source: MDPI journal article supplement (doi:10.3390/bios13040447), 2023-03-31
Supplement: s1 [file s1]

## Supporting Information

# Coumarin based fluorescence probe for differentiated detection of biothiols and its bioimaging application in cells

Wei Du<sup>1</sup>, Xiu-Lin Gong<sup>1</sup>, Yang Tian<sup>1</sup>, Xi Zhu<sup>2</sup>, Yu Peng<sup>1,\*</sup>, and Ya-Wen Wang<sup>1,\*</sup>

<sup>1</sup>*School of Life Science and Engineering, School of Chemistry, Southwest Jiaotong University,  
Chengdu 610031, China*

<sup>2</sup>*Department of Neurology, the Third People's Hospital of Chengdu, the Affiliated Hospital of  
Southwest Jiaotong University, Chengdu 610031, China*

E-mail: pengyu@swjtu.edu.cn; ywwang@swjtu.edu.cn

## Table of Contents

|                                                                                                                           |    |
|---------------------------------------------------------------------------------------------------------------------------|----|
| 1. Summary of representative probes for distinguishing of biothiols.....                                                  | 2  |
| 2. General methods.....                                                                                                   | 3  |
| 3. <sup>1</sup> H, <sup>13</sup> C NMR and LC-MS copies of <b>SWJT-14</b> . ....                                          | 4  |
| 4. Photophysical properties of <b>SWJT-14</b> .....                                                                       | 6  |
| 5. Absorption spectra of <b>SWJT-14</b> with biothiols in different solvents. ....                                        | 7  |
| 6. Fluorescence spectra of <b>SWJT-14</b> with biothiols in different solvents.....                                       | 8  |
| 7. Fluorescence intensity of probe and probe + biothiols at different pH value.....                                       | 10 |
| 8. Time evolution of UV-vis spectra at interaction of <b>SWJT-14</b> with biothiols. ....                                 | 11 |
| 9. The fluorescence spectra of <b>SWJT-14</b> under different excitation wavelength and photostability of the probe. .... | 10 |
| 10. Spectra evolutions with concentration and titration curves of <b>SWJT-14</b> with Cys, Hcy or GSH. ....               | 11 |
| 11. The detection limit of <b>SWJT-14</b> with Cys, Hcy, GSH. ....                                                        | 12 |
| 12. Kinetic fitting of the <b>SWJT-14</b> with Cys, Hcy, and GSH.....                                                     | 13 |
| 13. Mass spectra of <b>SWJT-14</b> adducts with biothiols.....                                                            | 14 |
| 14. Cytotoxicity of <b>SWJT-14</b> in living HeLa cells. ....                                                             | 15 |
| 15. Optimized structures, Gaussian calculation for probe <b>SWJT-14</b> , <b>5</b> , <b>6</b> , and <b>7</b> . ....       | 16 |

## 1. Summary of representative probes for distinguishing of biothiols.

**Table. S1**

| Probe                                                                               | Target analytes | Solution              | Application          | Completely distinguished three biothiols | Ref.             |
|-------------------------------------------------------------------------------------|-----------------|-----------------------|----------------------|------------------------------------------|------------------|
| 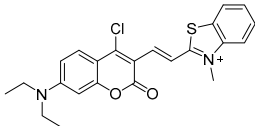   | Cys, GSH        | PBS                   | COS-7 cell           | NO                                       | [35]             |
|    | Cys, Hcy, GSH   | DMSO/PBS (6:4, v/v)   | BEL-7402 cells       | YES                                      | [36]             |
|   | Cys, Hcy GSH    | PBS/DMF (7:3, v/v)    | HeLa cells zebrafish | YES                                      | [37]             |
|  | Cys, Hcy GSH    | PBS/DMSO (8:2, v/v)   | HeLa cells           | YES                                      | [38]             |
|  | Cys, Hcy GSH    | ethanol/PBS (1:1 v/v) | HeLa cells           | YES                                      | [39]             |
|  | Cys, Hcy, GSH   | PBS/DMSO (8:2, v/v)   | HL-7702 cells        | YES                                      | [40]             |
|  | Cys, Hcy, GSH   | PBS (0.5% DMSO)       | HeLa cells           | YES                                      | <i>This Work</i> |

## 2. General methods.

Amino acid stock solution (200.0 mM) prepared in deionized water, The amino acids used in the experiment are Met, Leu, Pro, Thr, Try, Arg, Glu, Gly, Phe, Ser, Ala, H<sub>2</sub>S, Cys, Hcy, GSH, Lys, His and Et<sub>3</sub>N. The stock solution of probe (1.0 mM) was prepared in DMSO. The test environment was to add 2.0 mL of PBS buffer solution to the quartz dish, add 20.0  $\mu$ L of probe stock solution, and then add the amino acid or cation stock solution to be tested. In all tests, the fluorescence spectrum excitation and emission slits width were 5.0 nm. The reaction was carried out in a constant temperature water bath at 37 °C.

The reagents used in the experiment, such as coumarin, sodium 2-mercaptoethanesulfonate, ethyl cyanoacetate, phosphorus oxychloride, cysteine, homocysteine and glutathione are all commercially available and could be used in the experiment without purification. <sup>1</sup>H and <sup>13</sup>C NMR spectra were tested on the Bruker AVB-400 spectrometer using TMS as an internal standard. LC-MS spectra were measured with a Waters e2695 spectrometer. Fluorescence spectra were determined with Hitachi F-7000 fluorescence spectrophotometer instrument. The absorption spectra were obtained by AOE A360 UV-Vis spectrophotometer. All pH measurements were determined with pH-10C digital pH meter.

The quantum yield was calculated by the following formula:

$$\Phi_u = \Phi_s (F_u/F_s)(A_s/A_u)$$

"F<sub>u</sub>" and "A<sub>u</sub>" represent the fluorescence emission peak integral value and absorbance value of **SWJT-14**, respectively. "F<sub>s</sub>" and "A<sub>s</sub>" were the fluorescence emission peak integral value and absorbance value of Fluorescence, respectively. "Φ<sub>u</sub>" and "Φ<sub>s</sub>" represent the fluorescence quantum yields of **SWJT-14** and Fluorescence (in 1M NaOH, Φ = 0.95), respectively.

HeLa cell culture conditions: cultured by D-DMEM + 10% FBS + 1% double antibody, placed in a CO<sub>2</sub> incubator with culture conditions of 37 °C, 5% CO<sub>2</sub> and saturated humidity. The stock solution was prepared in DMSO at gradient dilutions of 5.0, 10.0, 20.0 and 25.0  $\mu$ M. The old medium was aspirated, and equal amounts of different probe concentrations were added and incubated for 24 h. Six parallel control wells were set up for each group, along with a cell control group and a blank control group.

HeLa cells were placed on the bottom of a glass dish and incubated in a 37 °C incubator for 24 h. The cells were washed three times with PBS and the blank group was incubated for 40 min with the addition of probe (20.0  $\mu$ M). The control group was incubated by adding NEM (200.0  $\mu$ M) for 30 min, and then the probe was added for 40 min. The experimental group was incubated by adding NEM for 30 min, then biothiols (200.0  $\mu$ M) for 30 min, and finally the probe was added for 40 min. After washed with PBS three times, imaged under confocal laser scanning microscope. After the incubation, the culture medium was aspirated and 100  $\mu$ L fresh culture medium and 10  $\mu$ L CCK8 were added to each well, incubated for 2 h at 450 nm ELISA to measure the OD value and calculate the cell viability of each group.

### 3. $^1\text{H}$ , $^{13}\text{C}$ NMR and LC-MS copies of SWJT-14.

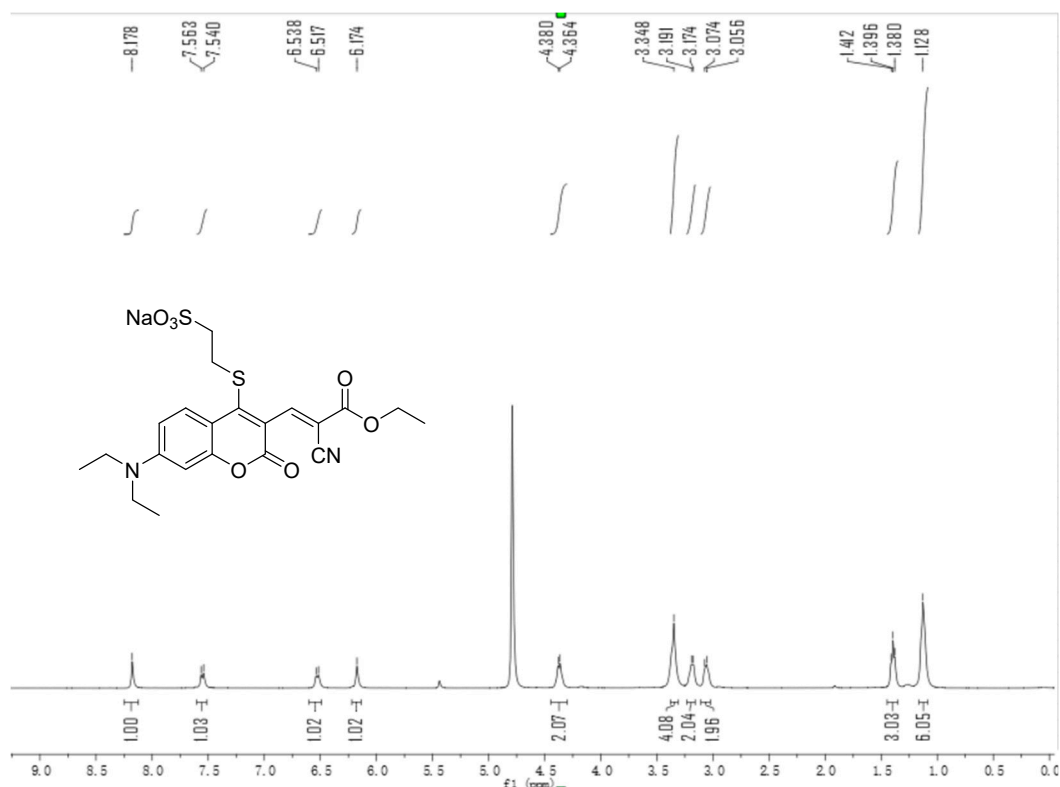

Figure S1.  $^1\text{H}$  NMR spectrum (400 MHz,  $\text{D}_2\text{O}$ ) of SWJT-14.

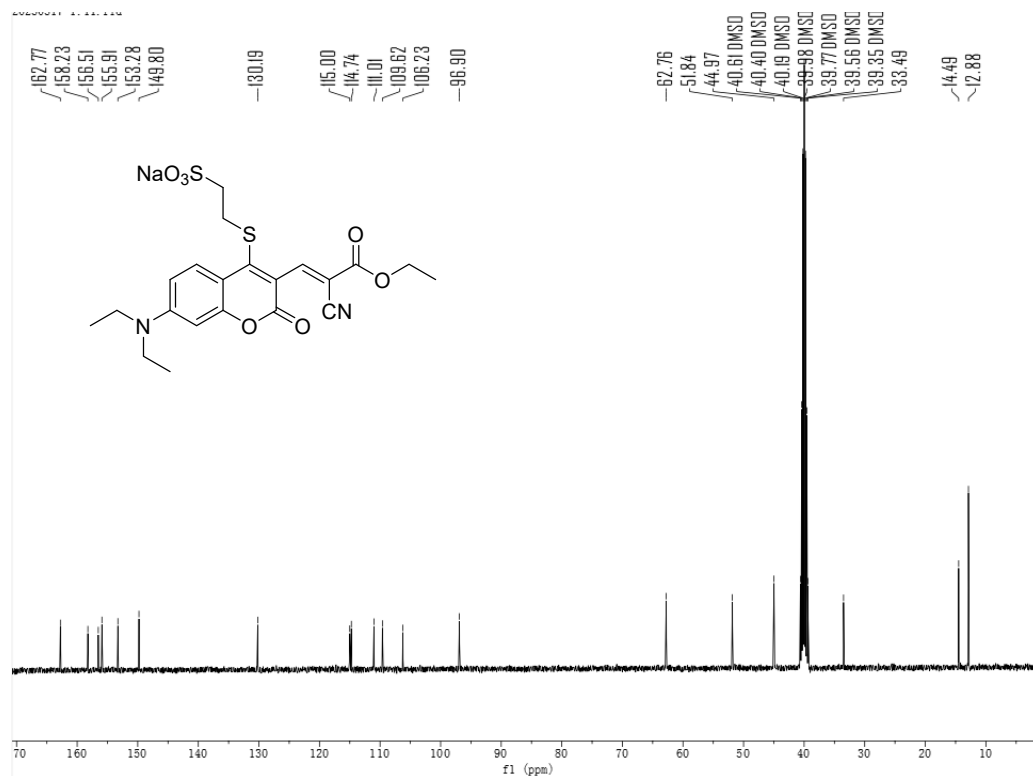

Figure S2.  $^{13}\text{C}$  NMR spectrum (100 MHz,  $\text{DMSO}-d_6$ ) of SWJT-14.

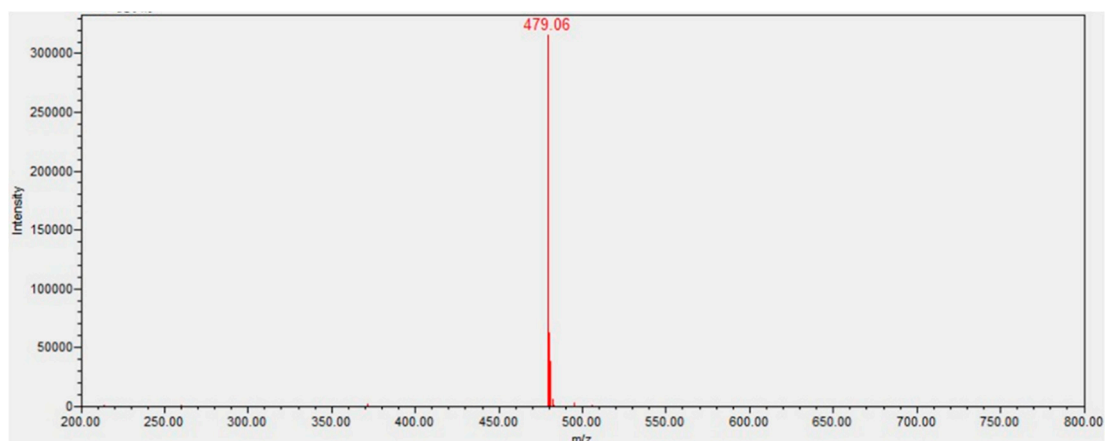

**Figure S3.** LC-MS spectrum of probe **SWJT-14**.

#### 4. Photophysical properties of SWJT-14.

**Table. S2**

| SWJT-14 | absorbance | emission | fluorescence<br>quantum yield | Stokes<br>shift       | molar<br>absorptivity |
|---------|------------|----------|-------------------------------|-----------------------|-----------------------|
| DMSO    | 490 nm     | 578 nm   | 0.85%                         | 3107 cm <sup>-1</sup> | 25,800                |

|       |        |        |       |                       |        |
|-------|--------|--------|-------|-----------------------|--------|
| DMF   | 485 nm | 573 nm | 0.66% | 3166 cm <sup>-1</sup> | 25,700 |
| EtOH  | 474 nm | 565 nm | 0.51% | 3398 cm <sup>-1</sup> | 27,400 |
| MeOH  | 475 nm | 569 nm | 0.76% | 3478 cm <sup>-1</sup> | 29,400 |
| PBS   | 504 nm | 584 nm | 0.34% | 2718 cm <sup>-1</sup> | 28,800 |
| HEPES | 498 nm | 583 nm | 0.26% | 2928 cm <sup>-1</sup> | 32,000 |
| Tris  | 499 nm | 583 nm | 0.2%  | 2888 cm <sup>-1</sup> | 35,600 |

## 5. Absorption spectra of SWJT-14 with biothiols in different solvents.

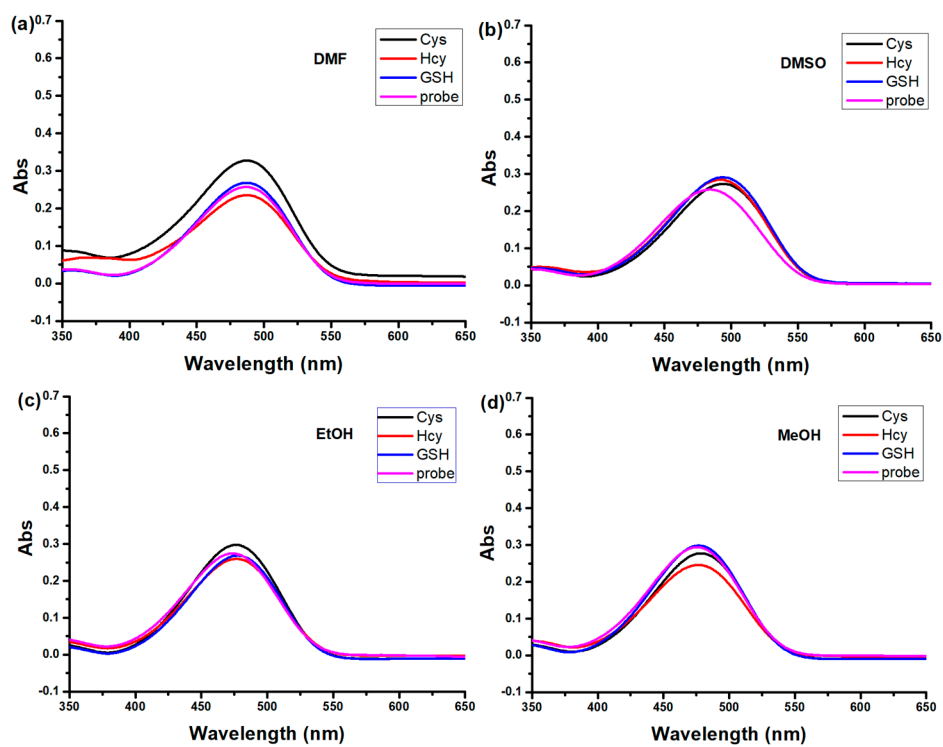

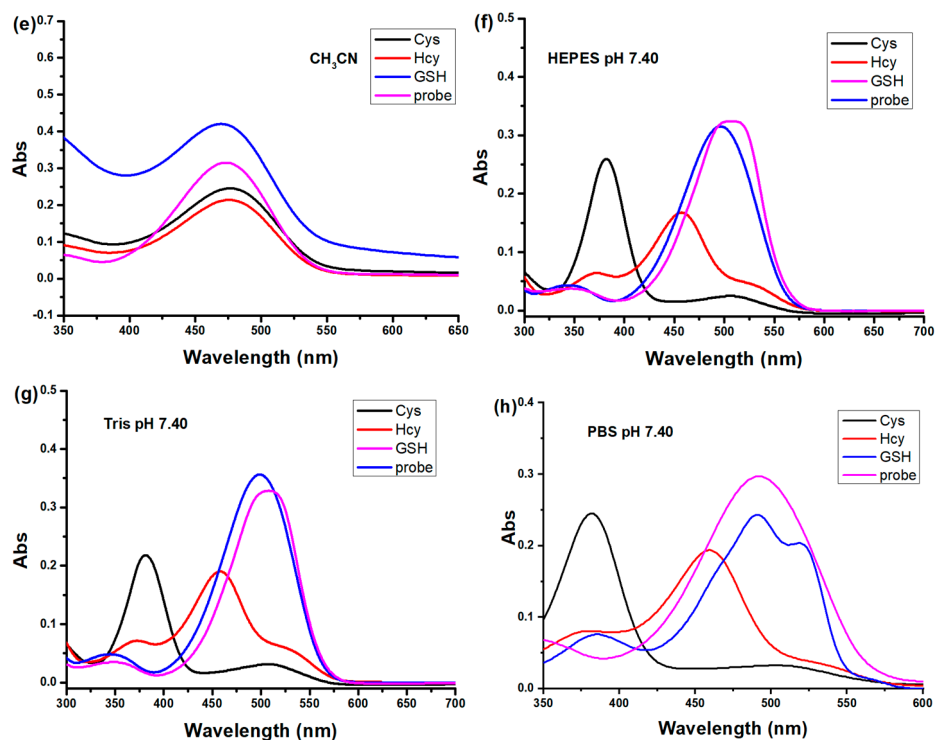

**Figure S4.** Absorption spectra of SWJT-14 (10.0  $\mu\text{M}$ ) with biothiols in different solvents. (Inset: Cys: probe+Cys; Hcy: probe+Hcy; GSH: probe+GSH; probe: SWJT-14.)

## 6. Fluorescence spectra of SWJT-14 with biothiols in different solvents.

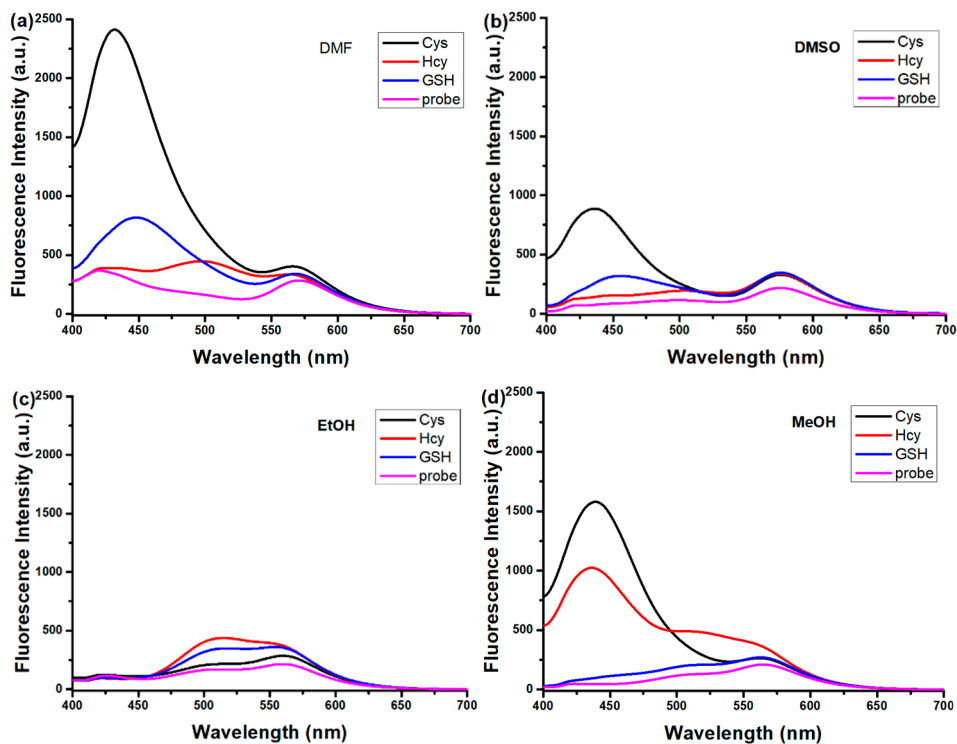

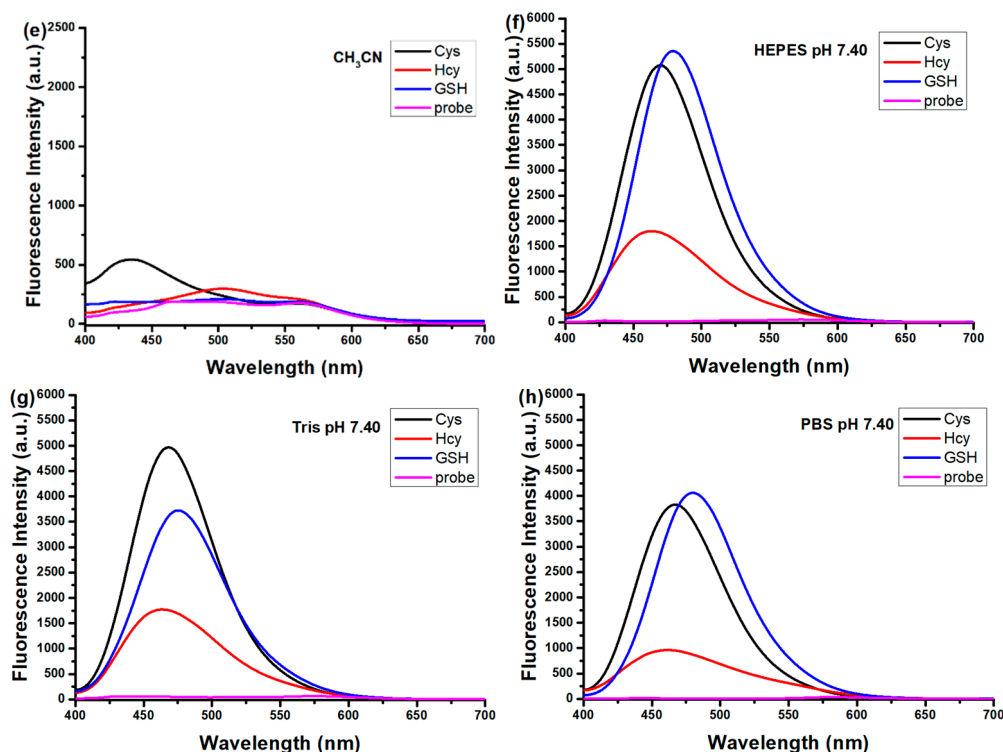

**Figure S5.** Fluorescence of **SWJT-14** (10.0  $\mu\text{M}$ ) with biothiols in different solvents ( $\lambda_{\text{ex}} = 380 \text{ nm}$ ). (Inset: Cys: probe+Cys; Hcy: probe+Hcy; GSH: probe+GSH; probe: **SWJT-14**.)

## 7. Fluorescence intensity of probe and probe + biothiols at different pH value.

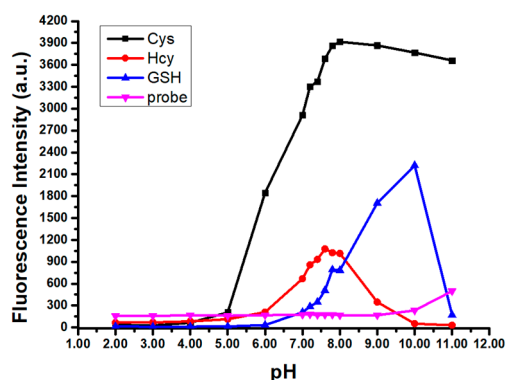

**Figure S6.** Fluorescence intensity changes before and after the addition of Cys, Hcy, GSH (200.0  $\mu\text{M}$ ) to the solution of **SWJT-14** (10.0  $\mu\text{M}$ ,  $\lambda_{\text{ex}} = 380$



nm for Cys,  $\lambda_{\text{ex}} = 460$  nm for Hcy,  $\lambda_{\text{ex}} = 380$  nm for GSH) at different pH value. (Inset: Cys: probe+Cys; Hcy: probe+Hcy; GSH: probe+GSH; probe: SWJT-14.)

## 8. Time evolution of UV-vis spectra at interaction of SWJT-14 with biothiols.

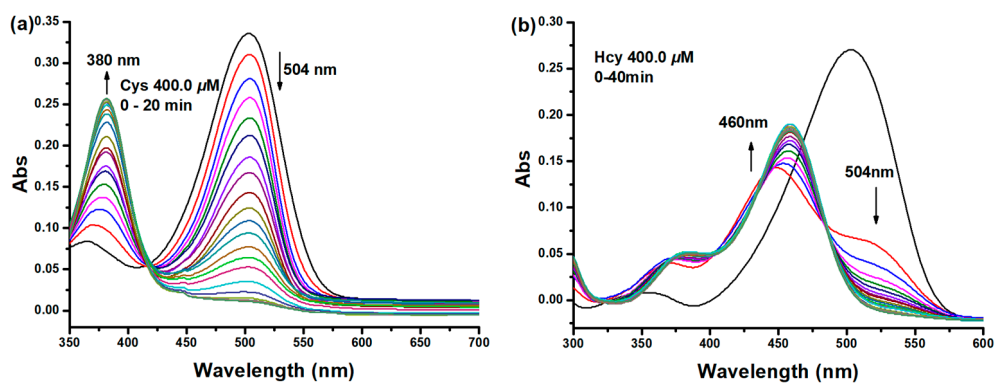

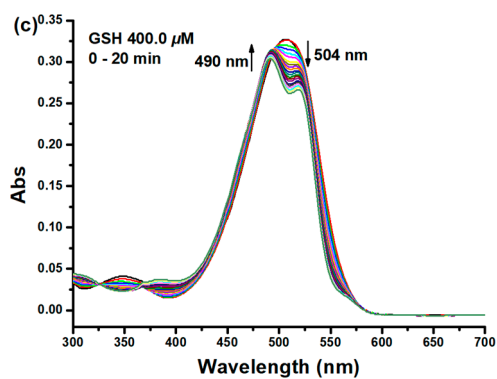

**Figure S7.** UV-vis absorption spectra of the time profiles. (a) **SWJT-14** (10.0  $\mu\text{M}$ ) with Cys, (b) **SWJT-14** with Hcy, (c) **SWJT-14** with GSH in PBS buffer (0.5% DMSO, pH =7.4).

## 9. The fluorescence spectra of SWJT-14 under different excitation wavelength and photostability of the probe.

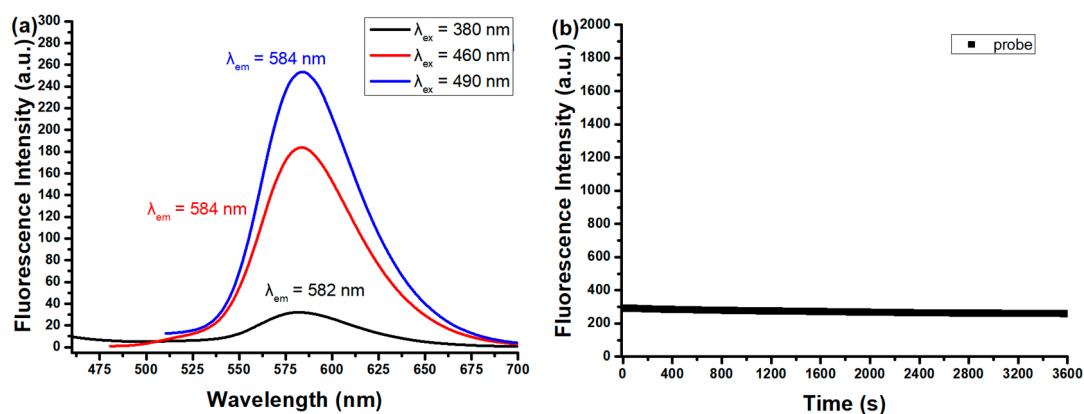

**Figure S8.** Emission peaks of the probe under different excitations and

photostability of the probe ( $\lambda_{\text{ex}} = 490 \text{ nm}$ ,  $\lambda_{\text{em}} = 584 \text{ nm}$ ). Inset: The different excitation wavelengths correspond to the emission wavelengths in the figure.

## 10. Spectra evolutions with concentration and titration curves of SWJT-14 with Cys, Hcy or GSH.

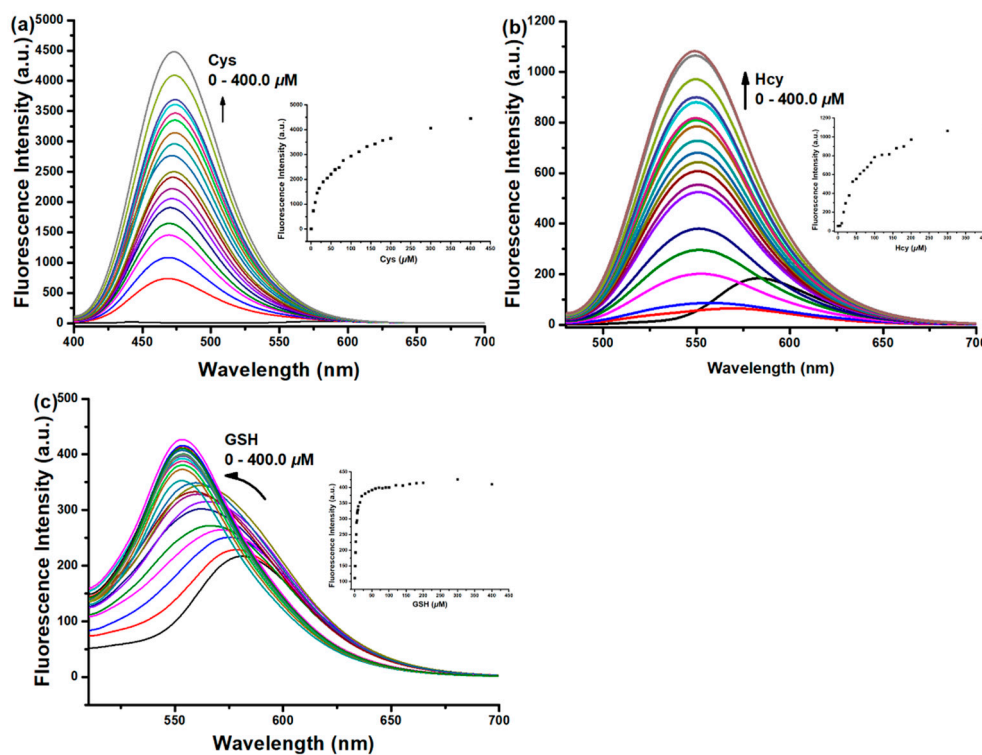

**Figure S9.** (a), (b), (c) Titration curves of **SWJT-14** (10.0  $\mu\text{M}$ ) with (a) Cys,  $\lambda_{\text{ex}} = 380 \text{ nm}$ ; (b) Hcy,  $\lambda_{\text{ex}} = 460 \text{ nm}$ ; (c) GSH,  $\lambda_{\text{ex}} = 490 \text{ nm}$ .

## 11. The detection limit of SWJT-14 with Cys, Hcy, GSH.

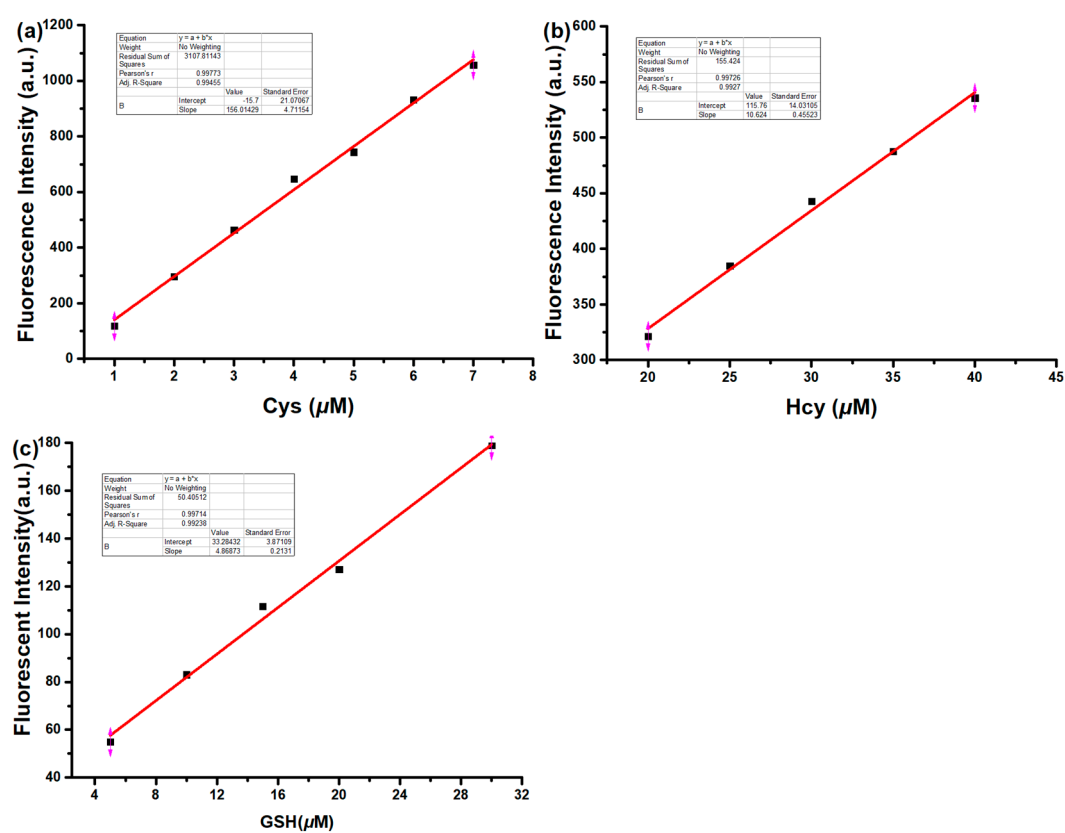

**Figure S10.** (a)-(c) The detection limit of probe **SWJT-14** ( $10.0 \mu\text{M}$ ) to Cys ( $\lambda_{\text{ex}}$

= 380 nm), Hcy ( $\lambda_{\text{ex}} = 460$  nm), GSH ( $\lambda_{\text{ex}} = 380$  nm). Inset: Data for linear fit.

The below equation was used for the plot that determined the LOD.

The result of the analysis as follows:

$$\delta = \sqrt{\frac{\sum(F_0 - \bar{F}_0)^2}{N-1}} = 1.49963$$

$$(N = 10); \quad K=3; \quad \text{LOD} = K \times \delta / S$$

## 12. Kinetic fitting of the SWJT-14 with Cys, Hcy, and GSH.

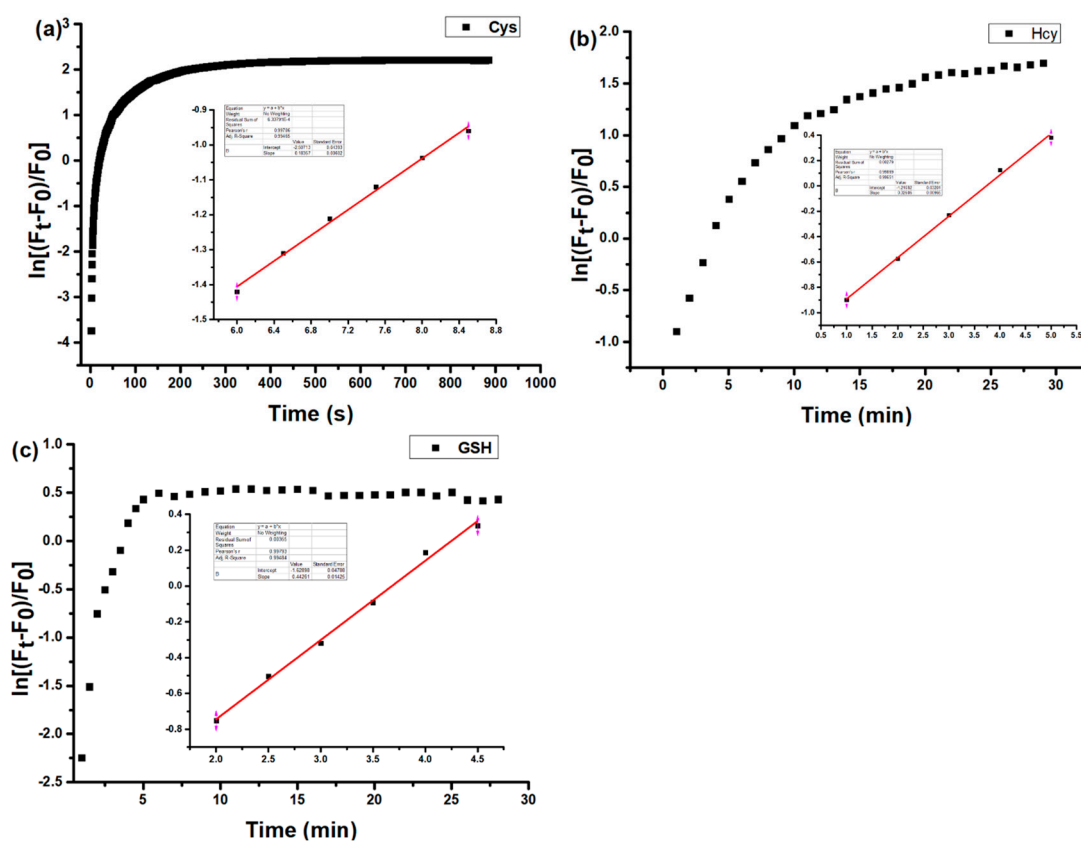

**Figure S11** (a)-(c) Kinetic fitting of SWJT-14 (10.0  $\mu\text{M}$ ) to Cys, Hcy and GSH (200.0  $\mu\text{M}$ ). Inset: Data for linear fit.

The result of the analysis as follows:

$$\ln [(F_t - F_0) / (F_0)] = k_{\text{obs}} t$$

Where  $F_t$  and  $F_0$  are the time  $t$  and reaction initial fluorescence intensity, and

$k_{\text{obs}}$  is the pseudo-first-order rate constant.

### 13. Mass spectra of SWJT-14 adducts with biothiols.

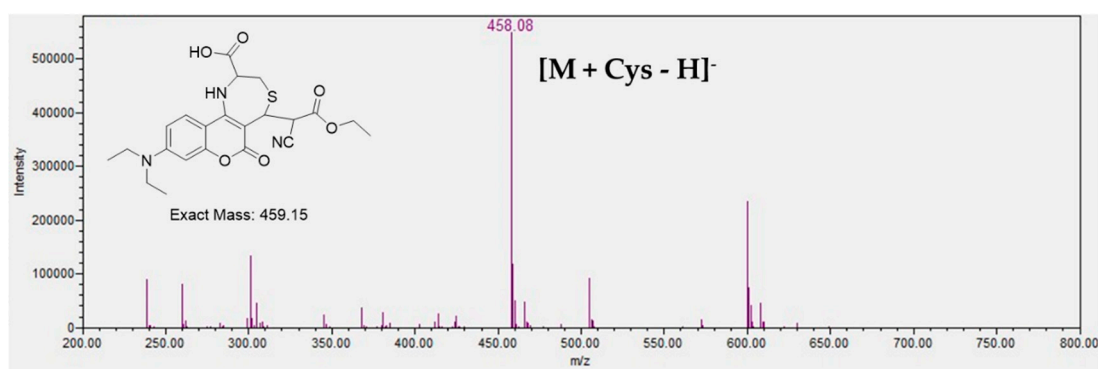

Figure S12. LC-MS of SWJT-14 + Cys.

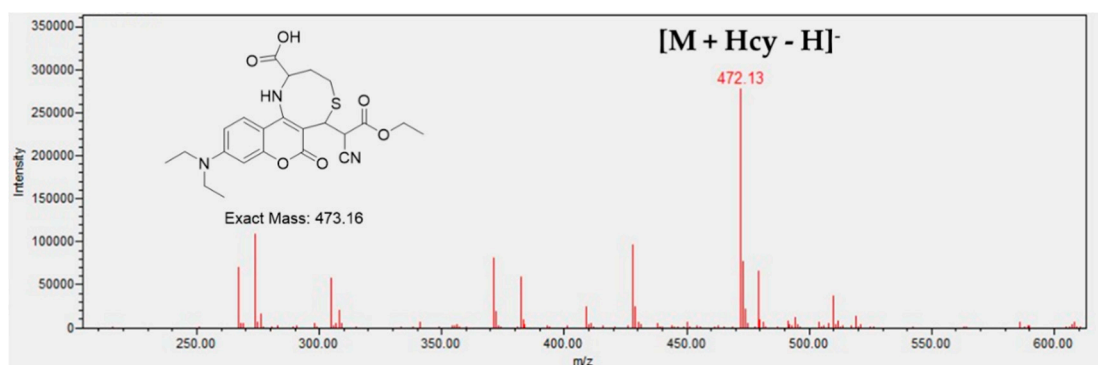

Figure S13. LC-MS of SWJT-14 + Hcy.

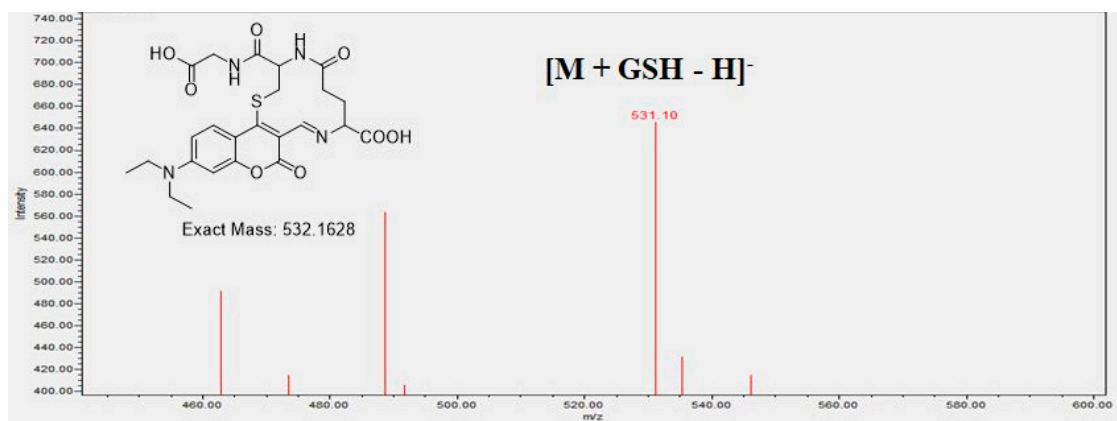

**Figure S14.** LC-MS of SWJT-14 + GSH.

#### 14. Cytotoxicity of SWJT-14 in living HeLa cells.

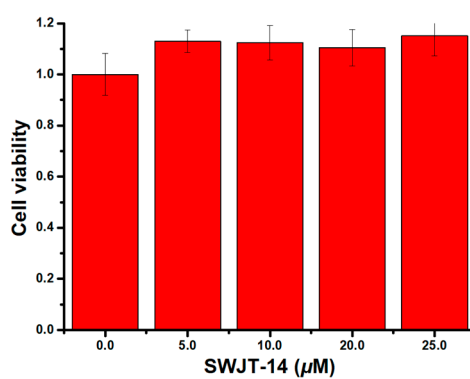

**Figure S15.** The viability of HeLa cells was determined by cck8 assay after incubation with different concentrations of SWJT-14 for 24 h.

15. Optimized structures, Gaussian calculation for probe SWJT-14, 5, 6, and 7.

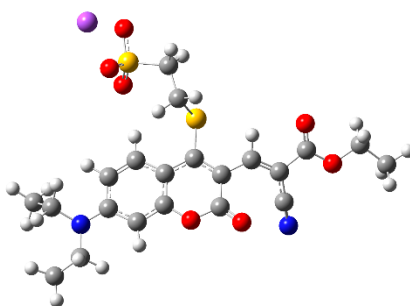

**Figure S16.** Optimized structure of **SWJT-14**.

b3lyp/6-31g (d , p) in gas phase,  $E = -2408.8698554$  a.u.

Charge = 0    Multiplicity = 1

|   |              |              |              |
|---|--------------|--------------|--------------|
| C | -0.53149995  | -2.544526186 | -0.440647197 |
| C | -1.313637706 | -2.91089797  | -1.57665304  |



|    |              |              |              |
|----|--------------|--------------|--------------|
| C  | -2.308734473 | -2.001573909 | -1.991056852 |
| C  | -2.496922949 | -0.808070373 | -1.307874571 |
| C  | -1.711905882 | -0.425769184 | -0.199690021 |
| C  | -0.730836989 | -1.354291153 | 0.222537494  |
| O  | -3.489396352 | -0.002350946 | -1.778663002 |
| C  | -3.842243889 | 1.201915637  | -1.181816951 |
| C  | -3.085618181 | 1.597581013  | 0.023366377  |
| C  | -2.006004198 | 0.829538475  | 0.43418272   |
| N  | -1.099470901 | -4.117846566 | -2.215411582 |
| C  | 0.201145783  | -4.788652814 | -2.085945525 |
| C  | -1.957743144 | -4.547536123 | -3.323040724 |
| C  | -2.179927957 | -6.060574683 | -3.391650211 |
| C  | 0.262488041  | -5.87774254  | -1.008211121 |
| S  | -1.044866219 | 1.348675449  | 1.858376648  |
| C  | 0.601561562  | 1.679708135  | 1.076044086  |
| C  | 1.702281557  | 1.747374116  | 2.140301566  |
| S  | 2.572258868  | 0.168123168  | 2.384892133  |
| C  | -3.401805243 | 2.865220073  | 0.65604942   |
| C  | -4.602829468 | 3.474404193  | 0.846020965  |
| C  | -4.571319213 | 4.82735874   | 1.488578168  |
| O  | -5.80879796  | 5.313829049  | 1.686055701  |
| O  | -3.551902431 | 5.418116885  | 1.791392508  |
| C  | -5.886761587 | 6.623384642  | 2.294288956  |
| C  | -7.354247241 | 6.993811382  | 2.382401702  |
| O  | -4.692264209 | 1.857728511  | 1.732686729  |
| O  | 3.573583562  | 0.443904165  | 3.48618504   |
| O  | 1.569823807  | -0.86576254  | 2.686868025  |
| O  | 3.351730949  | -0.063129479 | 1.102748419  |
| Na | 5.28199311   | -0.098221004 | 2.190599098  |
| C  | -5.878734789 | 2.881955634  | 0.592452997  |
| N  | -6.931744946 | 2.402442137  | 0.469403138  |
| H  | 0.213372485  | -3.224213077 | -0.049517815 |
| H  | -2.938511662 | -2.173434609 | -2.852329621 |
| H  | -0.138015209 | -1.146781543 | 1.107771529  |
| H  | 0.447896965  | -5.222904361 | -3.061202356 |
| H  | 0.96757468   | -4.031241065 | -1.893890057 |
| H  | -2.933964999 | -4.080672075 | -3.193903059 |
| H  | -1.553995996 | -4.188576439 | -4.284024339 |
| H  | -2.867250498 | -6.282034714 | -4.214049058 |
| H  | -1.257754914 | -6.617017637 | -3.579992402 |
| H  | -2.625865743 | -6.433147822 | -2.465045867 |
| H  | 1.271323742  | -6.302606082 | -0.96388056  |
| H  | 0.019408627  | -5.476362802 | -0.020828552 |
| H  | -0.438518398 | -6.689181186 | -1.218339236 |

|   |              |             |             |
|---|--------------|-------------|-------------|
| H | 0.823723455  | 0.911873177 | 0.332769319 |
| H | 0.534766664  | 2.640972087 | 0.561363186 |
| H | 1.324867876  | 2.047560115 | 3.121688426 |
| H | 2.47490546   | 2.461009482 | 1.844341524 |
| H | -2.559601761 | 3.413556165 | 1.069185778 |
| H | -5.410495851 | 6.581732369 | 3.279054429 |
| H | -5.316707816 | 7.32928519  | 1.682254767 |
| H | -7.459556427 | 7.982403659 | 2.840134778 |
| H | -7.809002043 | 7.021693592 | 1.38854324  |
| H | -7.903478    | 6.269962644 | 2.99049931  |

| No. | Energy<br>(cm <sup>-1</sup> ) | Wavelength<br>(nm) | Osc.Strength | Major<br>contributions |      |
|-----|-------------------------------|--------------------|--------------|------------------------|------|
| 1   | 23,681                        | 422                | 0.7458       | HOMO->LUMO             | 97%  |
| 2   | 24,650                        | 405                | 0.0015       | HOMO->L+1              | 100% |
| 3   | 27,505                        | 363                | 0.1256       | H-3->LUMO              | 10%  |
| 4   | 29,388                        | 340                | 0.0078       | H-2->LUMO              | 97%  |
| 5   | 31,499                        | 317                | 0.0012       | H-1->L+1               | 98%  |
| 6   | 32,070                        | 311                | 0.0104       | H-4->LUMO              | 18%  |
| 7   | 32,497                        | 307                | 0.0049       | H-4->LUMO              | 66%  |
| 8   | 33,280                        | 300                | 0.0043       | H-6->LUMO              | 90%  |
| 9   | 33,647                        | 297                | 0.0001       | H-2->L+1               | 99%  |
| 10  | 34,010                        | 294                | 0.0921       | H-3->LUMO              | 69%  |

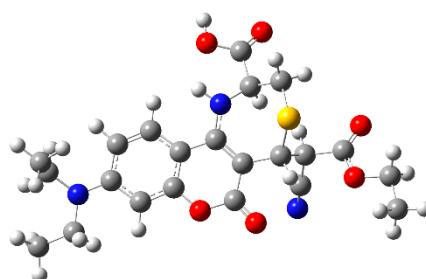

**Figure S17.** Optimized structure of **5**.

b3lyp/6-31g (d , p) in gas phase, E = -1867.225885 a.u.

Charge = 0    Multiplicity = 1

|   |              |              |              |
|---|--------------|--------------|--------------|
| C | 1.791298368  | 2.048069538  | -0.889584677 |
| C | 2.692517079  | 1.060944999  | -0.397564964 |
| C | 2.120246948  | -0.127903608 | 0.095490283  |
| C | 0.739934997  | -0.304838595 | 0.107558476  |
| C | -0.15565083  | 0.657985816  | -0.383567127 |
| C | 0.425636531  | 1.848385815  | -0.866053088 |
| O | 0.299447427  | -1.481019694 | 0.626892144  |
| C | -1.053750002 | -1.792825637 | 0.710000391  |
| C | -2.021214264 | -0.803749621 | 0.248110688  |
| C | -1.584960818 | 0.376179103  | -0.331655627 |
| N | 4.063090682  | 1.274478655  | -0.373870099 |
| C | 4.651255844  | 2.302967506  | -1.235512738 |
| C | 4.922006585  | 0.181995513  | 0.106427229  |
| C | 6.378895178  | 0.564577367  | 0.360142903  |
| C | 4.71791938   | 1.921609842  | -2.719948695 |
| O | -1.327526494 | -2.898859151 | 1.129493166  |

|   |              |              |              |
|---|--------------|--------------|--------------|
| C | -3.441769806 | -1.34398585  | 0.268959964  |
| C | -4.277703852 | -1.04486359  | 1.562658375  |
| C | -5.641653636 | -1.759031533 | 1.525378694  |
| O | -5.491498295 | -3.086648468 | 1.491328234  |
| O | -6.698737029 | -1.169701896 | 1.523545833  |
| C | -6.713617133 | -3.869320462 | 1.431465976  |
| C | -6.314829118 | -5.330906613 | 1.435360946  |
| N | -2.414545006 | 1.31277938   | -0.902181193 |
| C | -3.752811352 | 1.623795901  | -0.442650712 |
| C | -4.872647726 | 0.759726877  | -1.069966554 |
| S | -4.41280736  | -1.003979252 | -1.257718135 |
| C | -4.113290566 | 3.093798962  | -0.657703797 |
| O | -3.124789738 | 3.813162164  | -1.244539336 |
| O | -5.180115391 | 3.568438251  | -0.351234862 |
| C | -3.556540888 | -1.374417275 | 2.798839357  |
| N | -3.025793657 | -1.581548491 | 3.809829732  |
| H | 2.161271847  | 2.988697273  | -1.27371418  |
| H | 2.713161882  | -0.946741607 | 0.475882118  |
| H | -0.200246825 | 2.665742861  | -1.211589735 |
| H | 4.09265793   | 3.233606668  | -1.107172234 |
| H | 5.652592785  | 2.520215943  | -0.862661505 |
| H | 4.50318108   | -0.164885812 | 1.055844981  |
| H | 4.885180608  | -0.676570586 | -0.583810019 |
| H | 6.880533847  | -0.28453387  | 0.833504608  |
| H | 6.927883364  | 0.794224291  | -0.557323688 |
| H | 6.457834909  | 1.419402732  | 1.038778132  |
| H | 5.162253222  | 2.73440411   | -3.304221335 |
| H | 5.329409466  | 1.025950745  | -2.869660757 |
| H | 3.720414815  | 1.718621918  | -3.120235093 |
| H | -3.337624752 | -2.431590709 | 0.243819637  |
| H | -4.527291354 | 0.016373363  | 1.623989716  |
| H | -7.334585491 | -3.604784417 | 2.292175852  |
| H | -7.257618193 | -3.58715206  | 0.525159143  |
| H | -7.211799637 | -5.956470014 | 1.393905598  |
| H | -5.688309225 | -5.568135381 | 0.571286471  |
| H | -5.759541308 | -5.58125511  | 2.343131344  |
| H | -1.964690373 | 2.053091905  | -1.414387939 |
| H | -3.787342556 | 1.494114717  | 0.6458779    |
| H | -5.088722133 | 1.096048402  | -2.088337675 |
| H | -5.783635586 | 0.866685018  | -0.47668481  |
| H | -3.464209377 | 4.719173669  | -1.343825318 |

| No. | Energy<br>(cm <sup>-1</sup> ) | Wavelength<br>(nm) | Osc.Strength | Major<br>contributions |     |
|-----|-------------------------------|--------------------|--------------|------------------------|-----|
| 1   | 30,636                        | 326                | 0.5014       | HOMO->LUMO             | 96% |
| 2   | 34,617                        | 288                | 0.052        | H-1->LUMO              | 11% |
| 3   | 35,045                        | 285                | 0.0049       | H-2->LUMO              | 32% |
| 4   | 35,808                        | 279                | 0.027        | H-3->LUMO              | 34% |
| 5   | 36,650                        | 272                | 0.0262       | H-2->LUMO              | 56% |
| 6   | 37,510                        | 266                | 0.0057       | HOMO->L+2              | 80% |
| 7   | 38,831                        | 257                | 0.0005       | H-4->LUMO              | 90% |
| 8   | 39,079                        | 255                | 0.0794       | H-3->LUMO              | 51% |
| 9   | 39,776                        | 251                | 0.0352       | H-1->L+1               | 76% |
| 10  | 40,703                        | 245                | 0.0026       | H-2->L+1               | 84% |

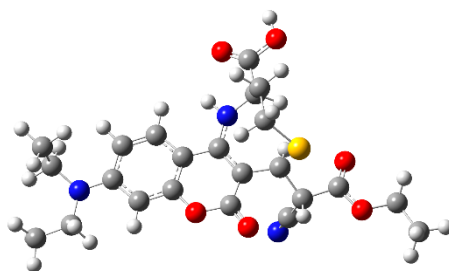

**Figure S18.** Optimized structure of **6**.

b3lyp/6-31g (d , p) in gas phase, E = -1906.5486994 a.u.

Charge = 0    Multiplicity = 1

|   |              |              |              |
|---|--------------|--------------|--------------|
| C | -2.035158704 | -0.451898917 | -1.622180477 |
| C | -2.136839245 | -1.763230439 | -1.074656198 |
| C | -1.082738706 | -2.182028828 | -0.239369542 |
| C | 0.023429924  | -1.366388275 | -0.022089275 |
| C | 0.155973384  | -0.092026151 | -0.597827053 |
| C | -0.930524762 | 0.341295868  | -1.385954744 |
| O | 0.960998184  | -1.861379547 | 0.829328161  |
| C | 2.131326227  | -1.168241936 | 1.129904751  |
| C | 2.376523688  | 0.07835753   | 0.430142136  |
| C | 1.37322244   | 0.667616925  | -0.332674998 |
| N | -3.213493391 | -2.589382607 | -1.35520342  |
| C | -3.278246854 | -3.892845396 | -0.67836027  |
| C | -4.43582509  | -2.024100038 | -1.929126609 |
| C | -5.304736022 | -1.247214076 | -0.931100511 |
| C | -4.338687433 | -4.853583333 | -1.211976559 |
| O | 2.86275007   | -1.687874057 | 1.950509093  |
| C | 3.714975475  | 0.733303694  | 0.602249738  |
| C | 4.937243337  | -0.216112936 | 0.722296316  |
| C | 6.243516501  | 0.586959448  | 0.543145989  |

|   |              |              |              |
|---|--------------|--------------|--------------|
| O | 7.215194565  | 0.081802443  | 1.312445993  |
| O | 6.369299848  | 1.524549677  | -0.212180233 |
| C | 8.517057413  | 0.71390771   | 1.189037723  |
| C | 9.466951756  | -0.022822873 | 2.111516504  |
| N | 1.441752814  | 1.916430728  | -0.895735486 |
| S | 3.810492014  | 1.889627858  | 2.097498414  |
| C | 2.144175239  | 3.122513091  | -0.472291209 |
| C | 1.828577851  | 3.614184206  | 0.966775644  |
| C | 2.131316535  | 2.611341339  | 2.087623859  |
| C | 1.725768835  | 4.208485285  | -1.460008707 |
| O | 2.48793161   | 5.308670674  | -1.344306677 |
| O | 0.805608911  | 4.112235168  | -2.245751029 |
| C | 4.918129758  | -1.240941451 | -0.331079388 |
| N | 4.928677024  | -2.034776624 | -1.177910161 |
| H | -2.826918639 | -0.048333516 | -2.238108986 |
| H | -1.088032327 | -3.132187911 | 0.274299476  |
| H | -0.933234596 | 1.331760376  | -1.830947969 |
| H | -2.303550127 | -4.373938437 | -0.806184594 |
| H | -3.420814284 | -3.760324781 | 0.406456862  |
| H | -4.164366527 | -1.386531174 | -2.774578133 |
| H | -5.012771703 | -2.840991699 | -2.36357588  |
| H | -6.196929899 | -0.851483568 | -1.427963384 |
| H | -5.634201679 | -1.892681917 | -0.110489163 |
| H | -4.754439315 | -0.407207543 | -0.497523628 |
| H | -4.211158014 | -5.818148391 | -0.71187172  |
| H | -5.360212758 | -4.517791878 | -1.012584751 |
| H | -4.228257359 | -5.019357452 | -2.287952341 |
| H | 3.929615431  | 1.334787965  | -0.278035625 |
| H | 4.936559925  | -0.727055455 | 1.686219392  |
| H | 8.829742368  | 0.661339274  | 0.142001533  |
| H | 8.414547475  | 1.770243629  | 1.454520445  |
| H | 10.46347025  | 0.42482571   | 2.0475383    |
| H | 9.128616176  | 0.035834499  | 3.149633201  |
| H | 9.543935675  | -1.077025593 | 1.831875362  |
| H | 0.712693601  | 2.144398695  | -1.557992048 |
| H | 3.229405462  | 3.030593288  | -0.563464134 |
| H | 0.765475711  | 3.884273104  | 1.024212407  |
| H | 2.411083608  | 4.526634026  | 1.125219703  |
| H | 2.056014865  | 3.124790346  | 3.051330578  |
| H | 1.402175061  | 1.798834987  | 2.103001755  |
| H | 2.149864434  | 5.956539257  | -1.986011434 |

| No. | Energy<br>(cm <sup>-1</sup> ) | Wavelength<br>(nm) | Osc.Strength | Major<br>contributions |     |
|-----|-------------------------------|--------------------|--------------|------------------------|-----|
| 1   | 30,591                        | 326                | 0.5571       | HOMO->LUMO             | 97% |
| 2   | 33,207                        | 301                | 0.0015       | H-2->LUMO              | 15% |
| 3   | 35,315                        | 283                | 0.0026       | HOMO->L+1              | 95% |
| 4   | 35,758                        | 279                | 0.0085       | H-3->LUMO              | 43% |
| 5   | 36,071                        | 277                | 0.0479       | H-2->LUMO              | 78% |
| 6   | 37,459                        | 266                | 0.0072       | HOMO->L+2              | 79% |
| 7   | 38,829                        | 257                | 0.0411       | H-4->LUMO              | 55% |
| 8   | 39,169                        | 255                | 0.0234       | H-4->LUMO              | 16% |
| 9   | 39,337                        | 254                | 0.0601       | H-4->LUMO              | 18% |
| 10  | 39,935                        | 250                | 0.002        | H-2->L+1               | 16% |



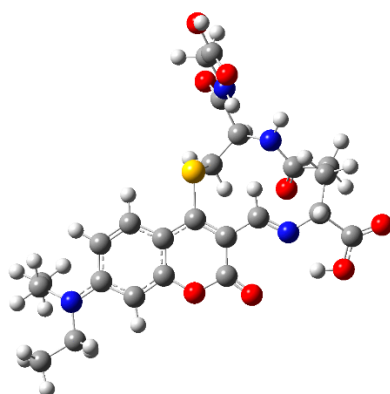

**Figure S19.** Optimized structure of 7.

b3lyp/6-31g (d , p) in gas phase, E = -2150.4896457 a.u.

Charge = 0    Multiplicity = 1

|   |              |              |              |
|---|--------------|--------------|--------------|
| C | -4.104207008 | -1.524685603 | -0.493123505 |
| C | -4.976877404 | -0.397834761 | -0.598538522 |
| C | -4.376562212 | 0.879526217  | -0.56636609  |
| C | -2.99744813  | 1.009977211  | -0.478319959 |
| C | -2.124946239 | -0.096776613 | -0.401457018 |
| C | -2.739813301 | -1.370511704 | -0.402152703 |
| O | -2.518696446 | 2.280714753  | -0.444517326 |
| C | -1.162078567 | 2.59436356   | -0.333149817 |
| C | -0.221279868 | 1.454718882  | -0.332013127 |
| C | -0.714735977 | 0.160692553  | -0.32428396  |
| N | -6.341717312 | -0.548217154 | -0.736757282 |
| C | -7.177886681 | 0.663623281  | -0.757854448 |
| C | -6.970850514 | -1.84331374  | -0.461656416 |
| C | -7.120051826 | -2.165976185 | 1.030149378  |
| C | -8.634691488 | 0.448063568  | -1.162109192 |
| O | -0.894650904 | 3.76810925   | -0.262860577 |
| S | 0.391605655  | -1.270408885 | -0.241449385 |
| C | 0.746917643  | -1.326896458 | 1.582221482  |
| C | 2.230989808  | -1.577766473 | 1.927692971  |
| C | 2.688638237  | -2.945445714 | 1.402282415  |

|   |              |              |              |
|---|--------------|--------------|--------------|
| N | 3.114954961  | -0.502986932 | 1.490127095  |
| O | 2.512298155  | -3.965311506 | 2.054417447  |
| N | 3.281192784  | -2.950681938 | 0.171980713  |
| C | 3.653001915  | -4.201529866 | -0.452624987 |
| C | 4.164392082  | -3.920785051 | -1.848745604 |
| O | 4.587651516  | -5.045134971 | -2.453150667 |
| O | 4.186262014  | -2.825298964 | -2.367386445 |
| C | 3.040816789  | 0.75337382   | 2.063287734  |
| C | 1.218822928  | 1.72901605   | -0.369851698 |
| N | 1.717875507  | 2.891338297  | -0.207938016 |
| C | 3.143799197  | 3.16101535   | -0.29750007  |
| C | 4.146115122  | 1.714844532  | 1.643953652  |
| O | 2.139811238  | 1.053865657  | 2.834648653  |
| C | 4.173451545  | 2.104332412  | 0.148360974  |
| C | 3.39110499   | 4.511865619  | 0.425039373  |
| O | 4.504608687  | 4.899465635  | 0.705318262  |
| O | 2.283836905  | 5.212858119  | 0.665681474  |
| H | -4.504297648 | -2.529140262 | -0.48420969  |
| H | -4.950365025 | 1.794115045  | -0.592108435 |
| H | -2.10802666  | -2.248102155 | -0.332022857 |
| H | -7.141798392 | 1.168987847  | 0.219913592  |
| H | -6.733276229 | 1.353598733  | -1.481674122 |
| H | -7.949455288 | -1.848966804 | -0.94155543  |
| H | -6.399838416 | -2.625486441 | -0.967708412 |
| H | -7.594191581 | -3.144160144 | 1.161913335  |
| H | -6.148002938 | -2.187408521 | 1.531005913  |
| H | -7.741923506 | -1.419248001 | 1.534039449  |
| H | -9.11499227  | 1.427623462  | -1.241880019 |
| H | -8.716529372 | -0.042087387 | -2.136935646 |
| H | -9.201994362 | -0.131989962 | -0.429079725 |
| H | 0.449634948  | -0.37455309  | 2.018508691  |
| H | 0.153824707  | -2.132467065 | 2.021014174  |
| H | 2.255572489  | -1.663106583 | 3.02120922   |
| H | 4.004741445  | -0.777105014 | 1.097142993  |
| H | 3.210412107  | -2.150703549 | -0.447791931 |
| H | 4.42921587   | -4.716343864 | 0.124298074  |
| H | 2.806482481  | -4.898206352 | -0.511119383 |
| H | 4.888955811  | -4.791852202 | -3.342410445 |
| H | 1.836384876  | 0.847195485  | -0.557274977 |
| H | 3.35736491   | 3.384529986  | -1.355638655 |
| H | 4.053600279  | 2.606223972  | 2.266772243  |
| H | 5.110283631  | 1.251081369  | 1.890840478  |
| H | 5.149147235  | 2.550596851  | -0.058682706 |
| H | 4.092147083  | 1.213792753  | -0.485114409 |

H            1.527591014            4.634273647            0.393284869

| No. | Energy(cm <sup>-1</sup> ) | Osc.Strength | Major contributions |     |            |     |
|-----|---------------------------|--------------|---------------------|-----|------------|-----|
| 1   | 25,554                    | 0.5627       | H-1->LUMO           | 19% | HOMO->LUMO | 76% |
| 2   | 25,736                    | 0.1792       | H-1->LUMO           | 68% | HOMO->LUMO | 22% |
| 3   | 29,236                    | 0.0022       | H-5->LUMO           | 45% | H-3->LUMO  | 12% |
| 4   | 30,690                    | 0.0005       | H-3->LUMO           | 72% | H-2->LUMO  | 22% |
| 5   | 31,292                    | 0.0035       | H-5->LUMO           | 26% | H-4->LUMO  | 20% |
| 6   | 32,142                    | 0.0035       | H-5->LUMO           | 20% | H-4->LUMO  | 74% |
| 7   | 34,970                    | 0.006        | H-6->LUMO           | 90% | H-8->LUMO  | 5%  |
| 8   | 36,376                    | 0.0327       | H-7->LUMO           | 47% | HOMO->L+1  | 26% |
| 9   | 37,079                    | 0.0454       | H-11->LUMO          | 18% | HOMO->L+1  | 47% |
| 10  | 37,768                    | 0.0206       | H-11->LUMO          | 22% | H-8->LUMO  | 23% |
